# Supplementary material
Source: PubMed Central journal article supplement (PMC5583482)
Supplement: AEM.01061-17_zam999118037s1.pdf [file AEM.01061-17_zam999118037s1.pdf]

Supplementary Figure 1. Host specificity analysis of SFB 16S rRNA gene sequences.

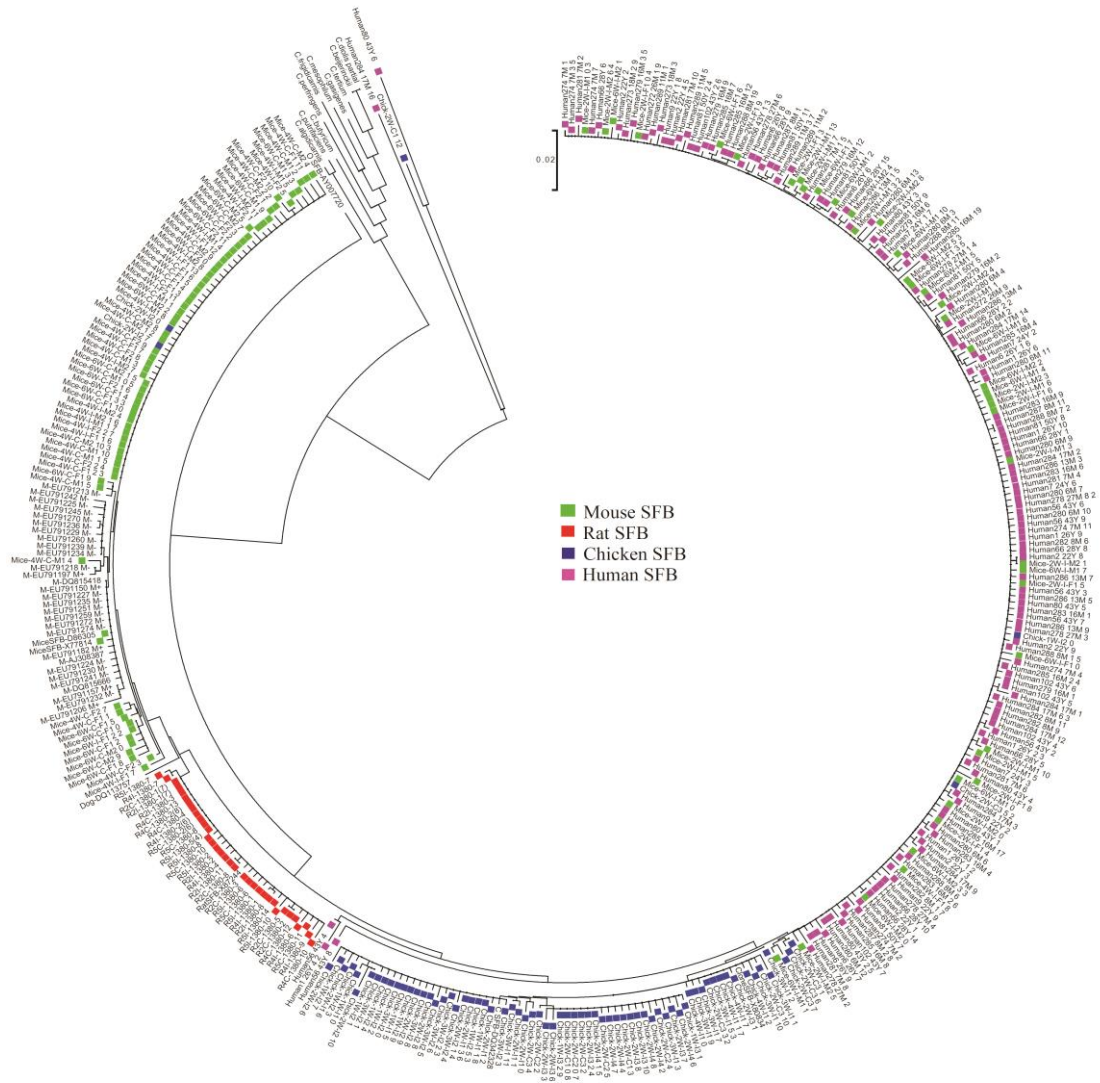

Supplementary Figure 2. Host specificity analysis of SFB *fliC1* at nucleotide and deduced amino acid levels.

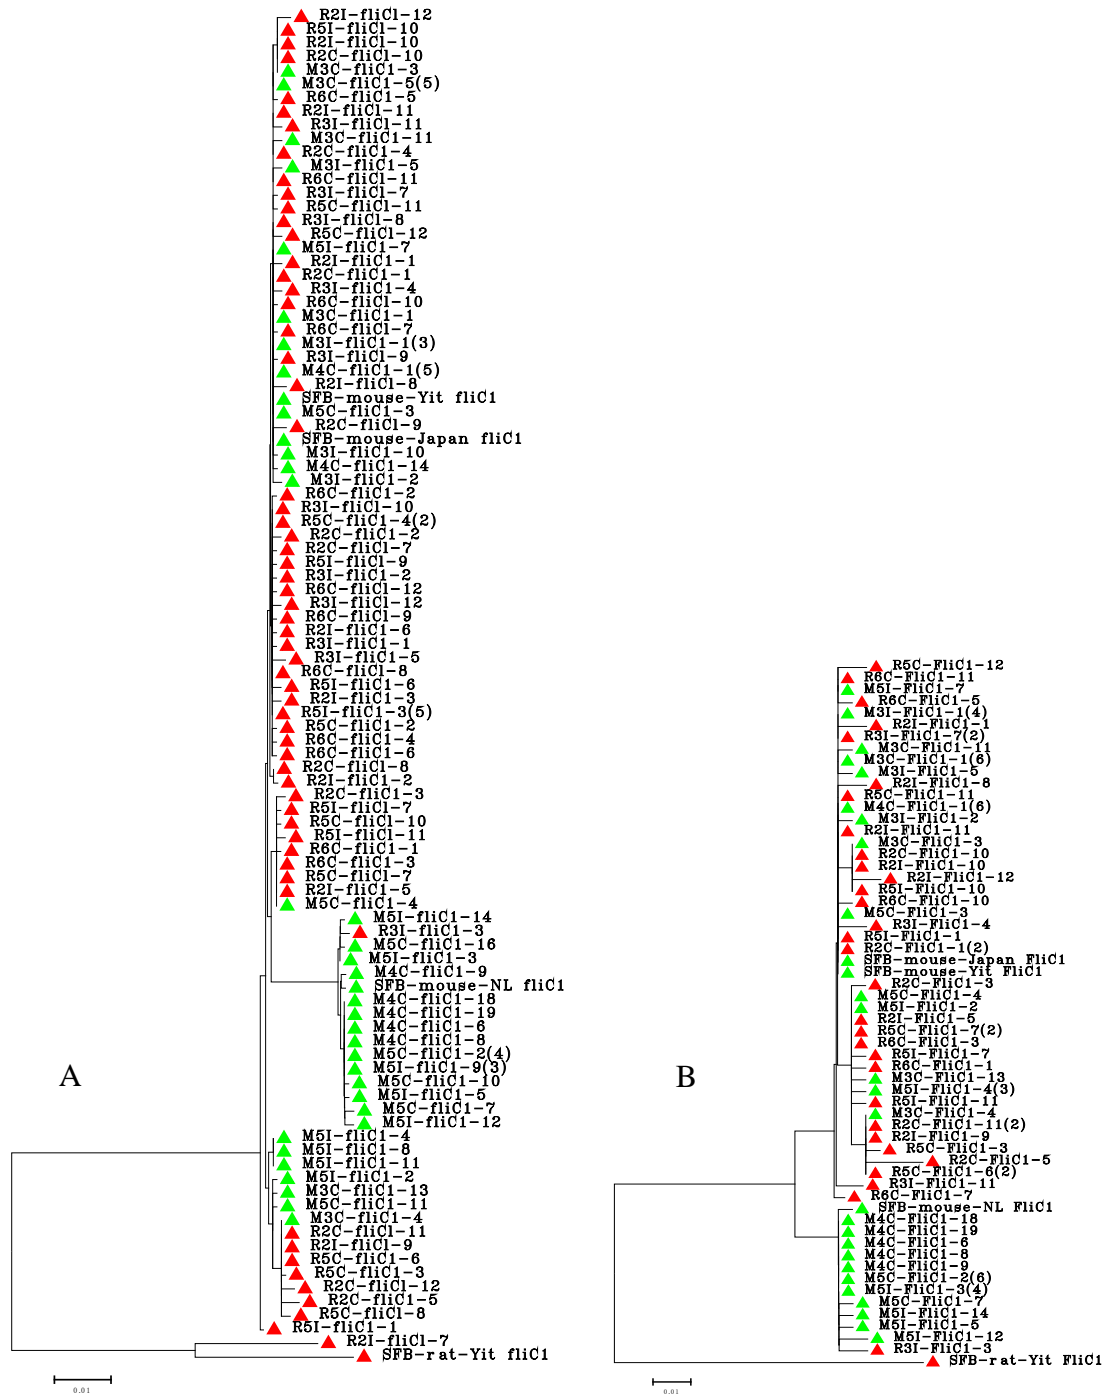

**Supplementary Figure 3. Staining of *E. coli* BL21 and *Salmonella* CVCC519 with DAPI and SFB FliC3 antibody.**

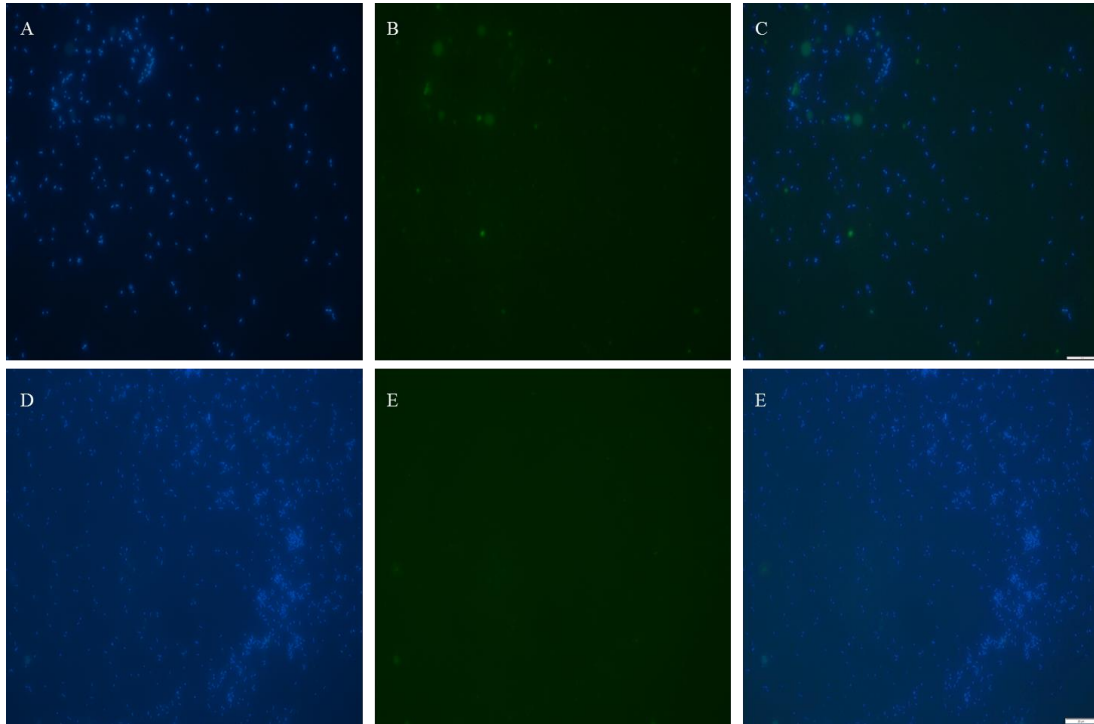

**Supplementary Figure 4. Expression of SFB FliC3 in mouse ileum mucosa and cecal content using FISH and IHC analysis.**

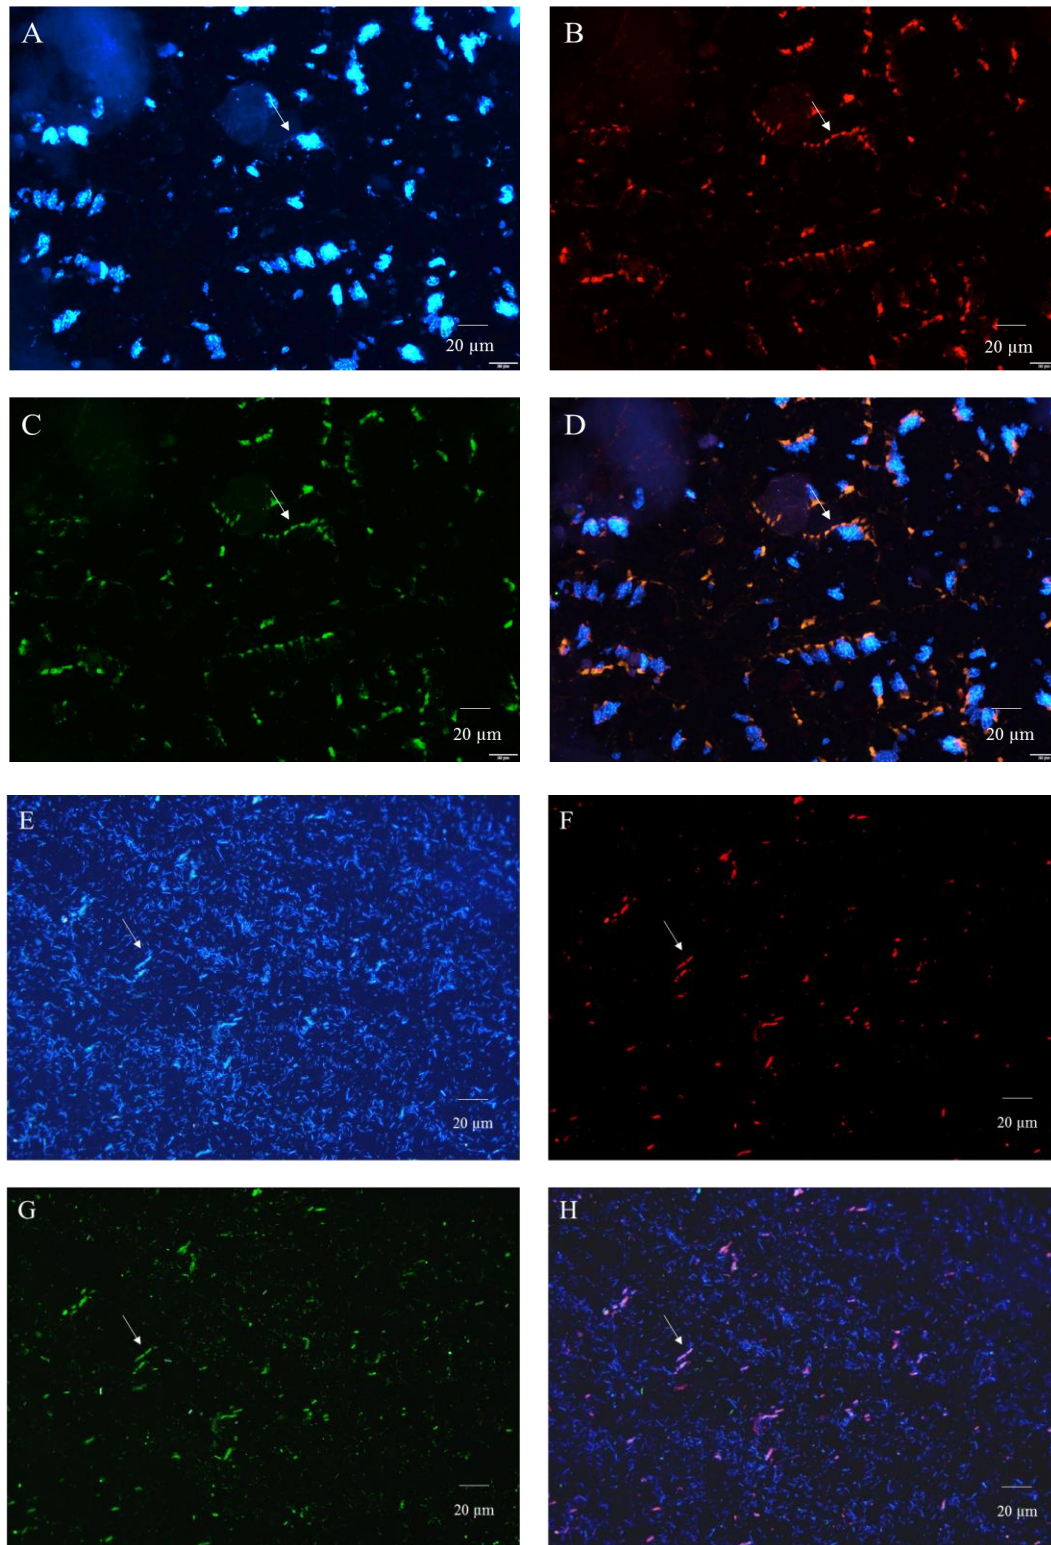

**Supplementary Figure 5. Relative location of SFB in gut epithelial tissue.**

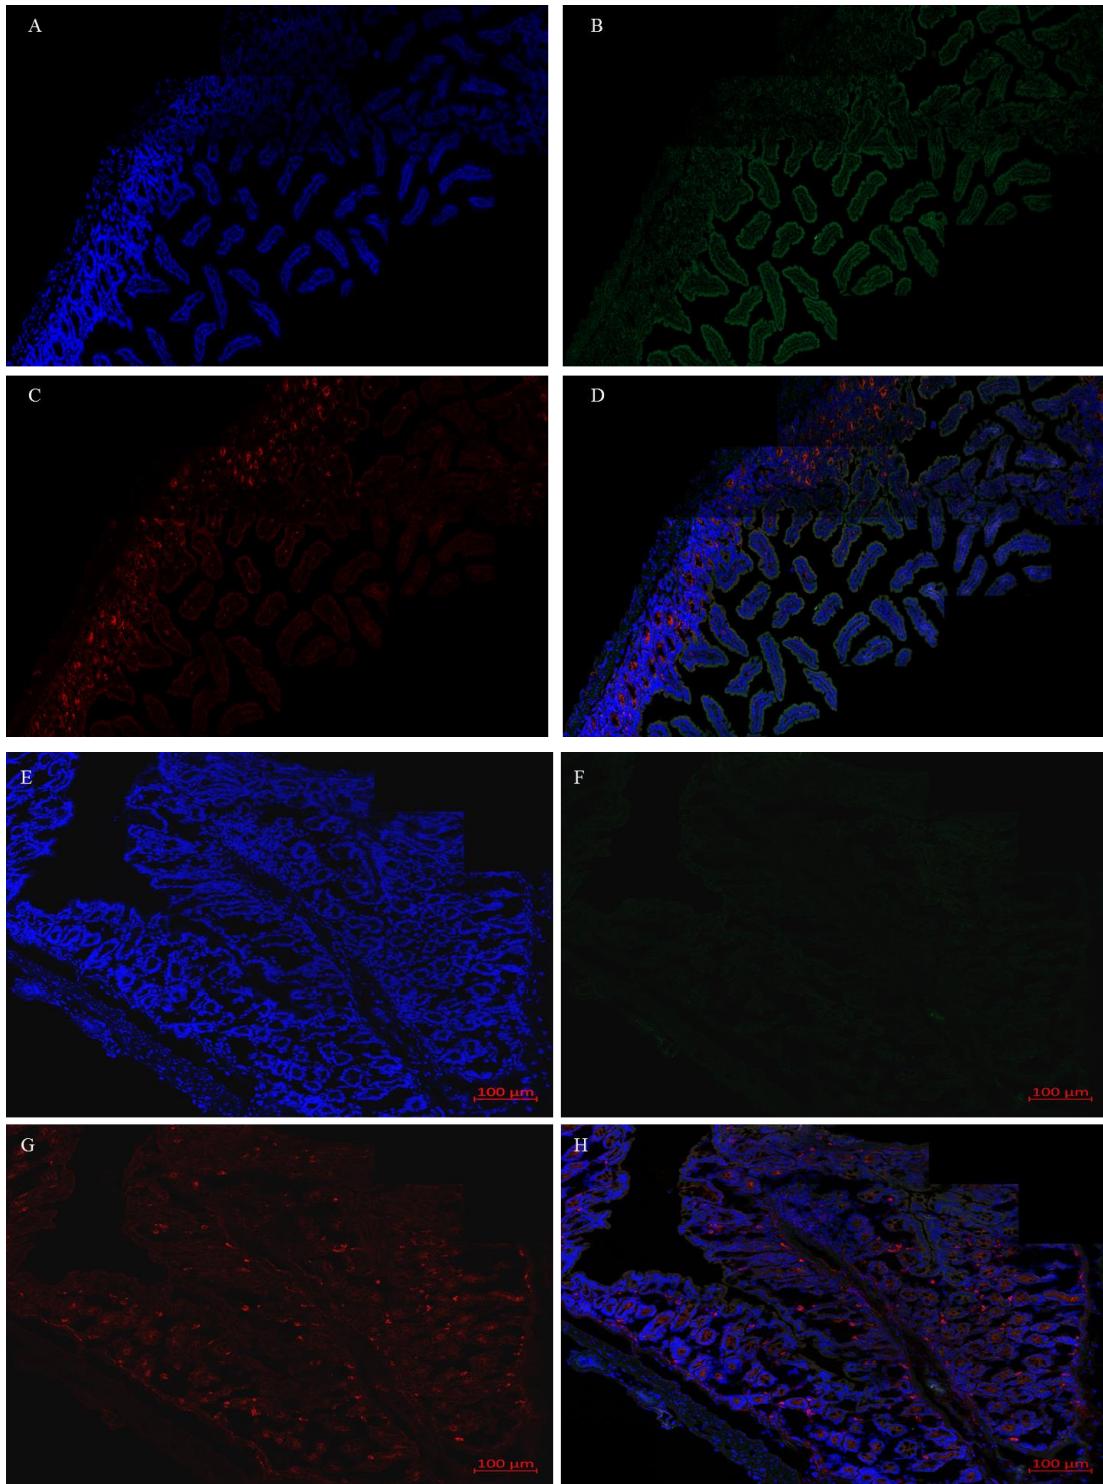

**Supplementary Figure 6. Identification of genes related to flagellar assembly using LC/MC/MC in mouse gut samples.**

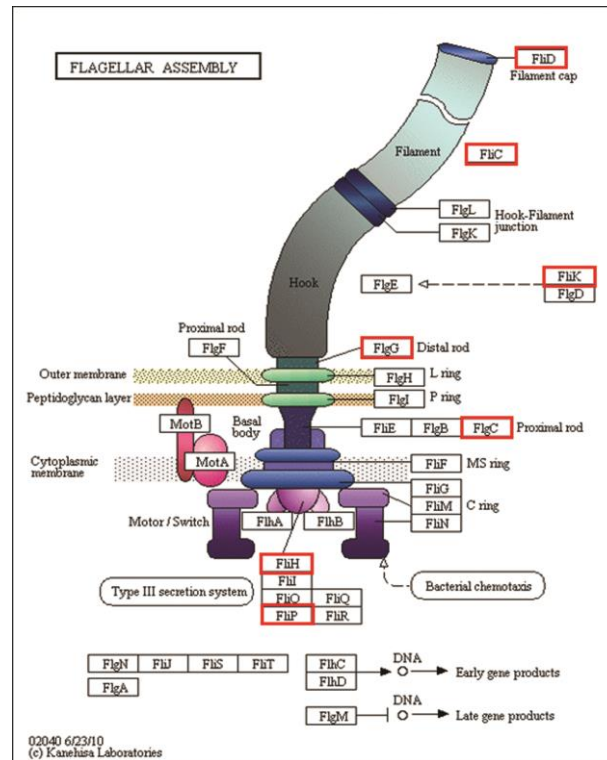

**Supplementary Figure 7. Peptides identified from purified mFliC3 bands.**

**A**

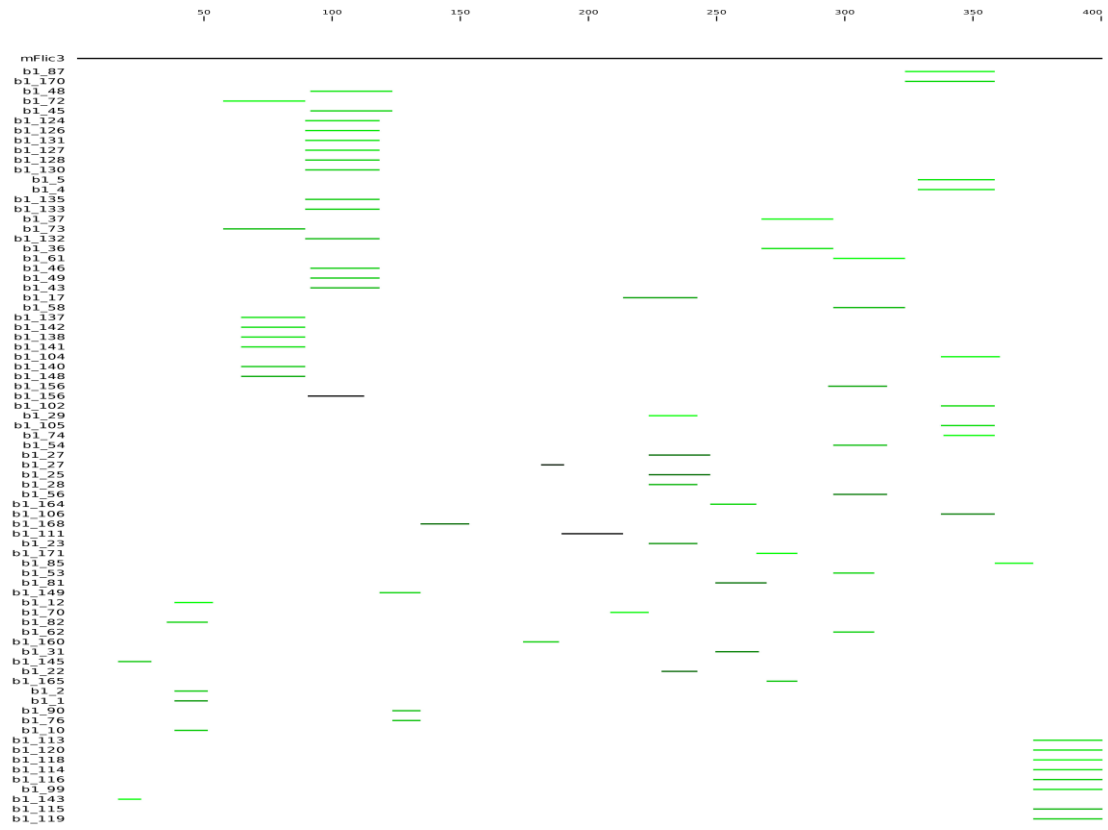

**B**

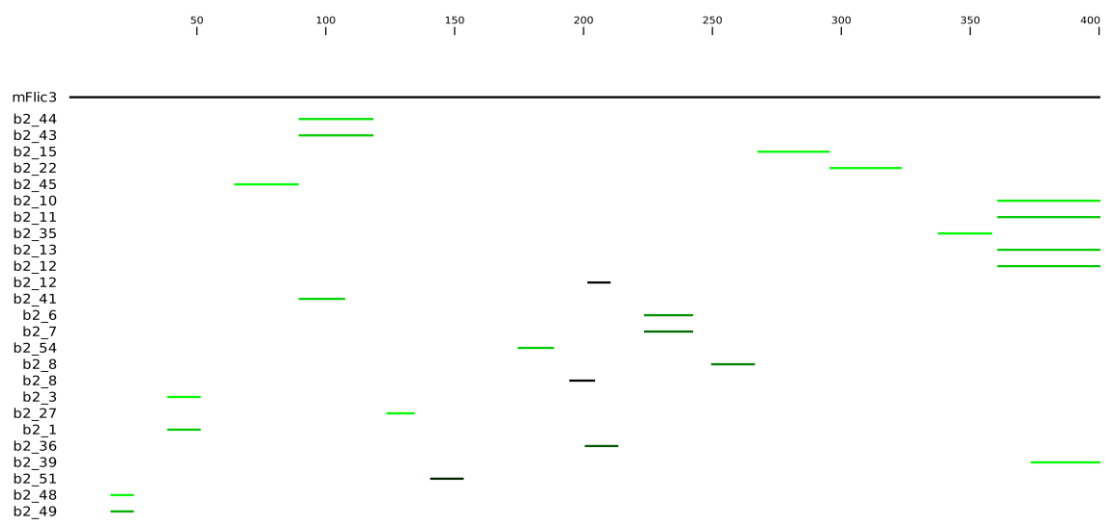

**Supplementary Figure 8. Phylogenetic analysis of TLR5 genes at the nucleotide and deduced amino acid levels.**

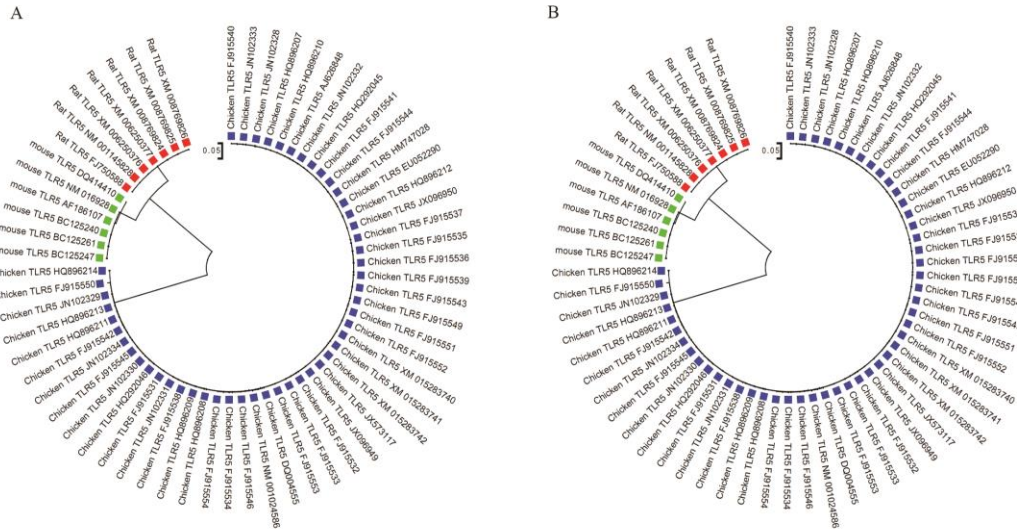



Supplementary Figure 9. RFLiC3 enriched proteins related to the lysosome pathway.

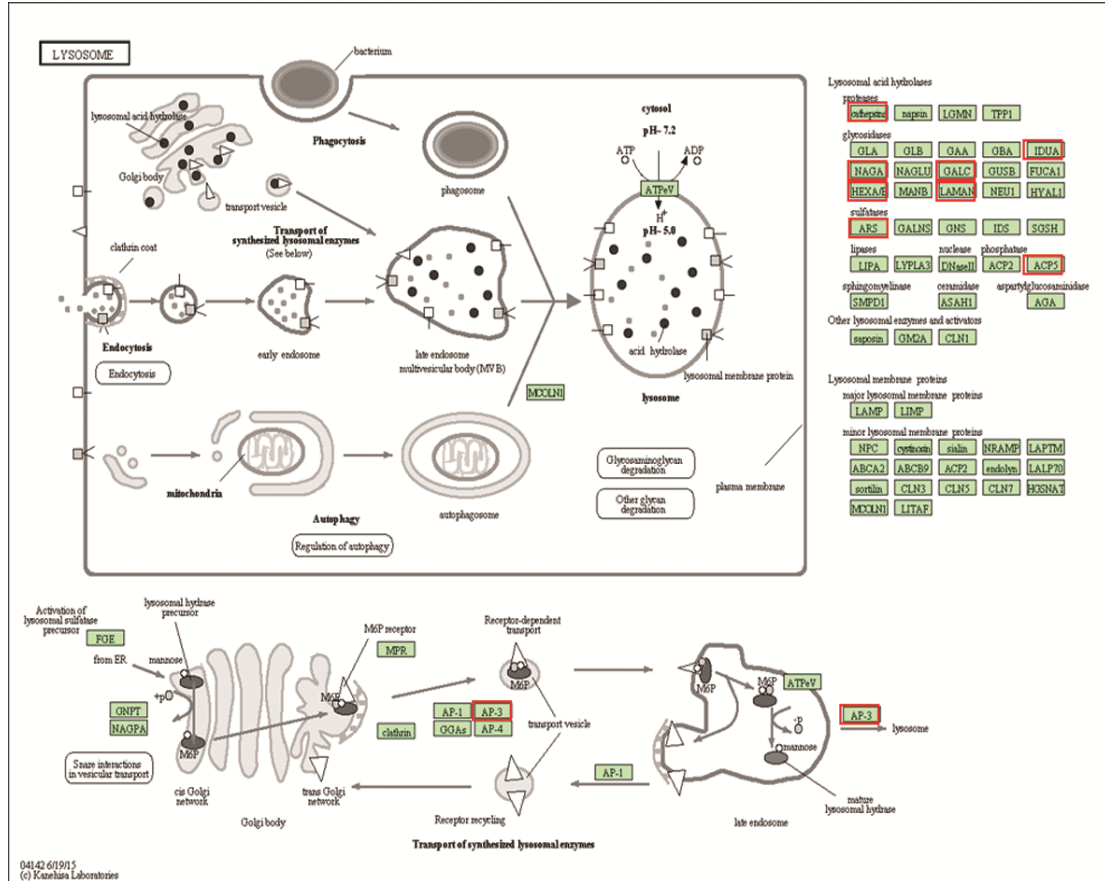

**Supplementary Figure 10. Degradation of mFliC3 and rFliC3 by rat ileum tissue proteins.**

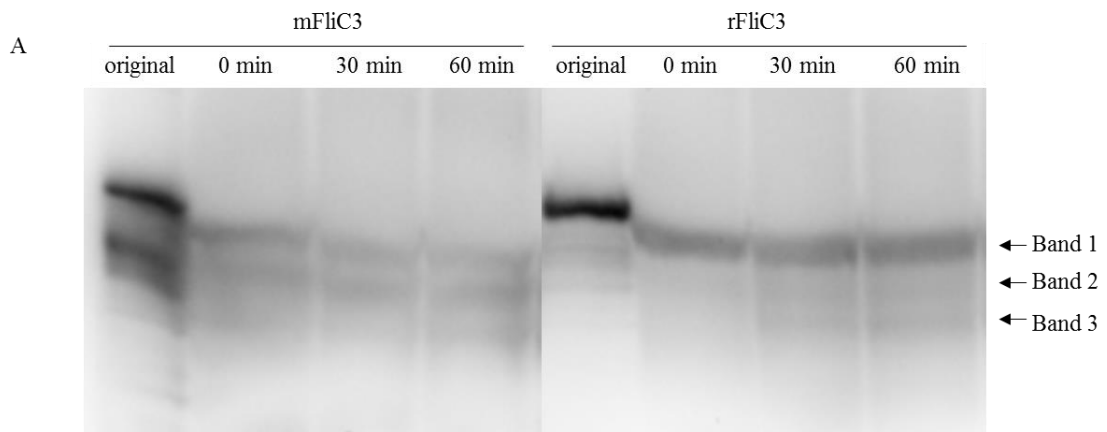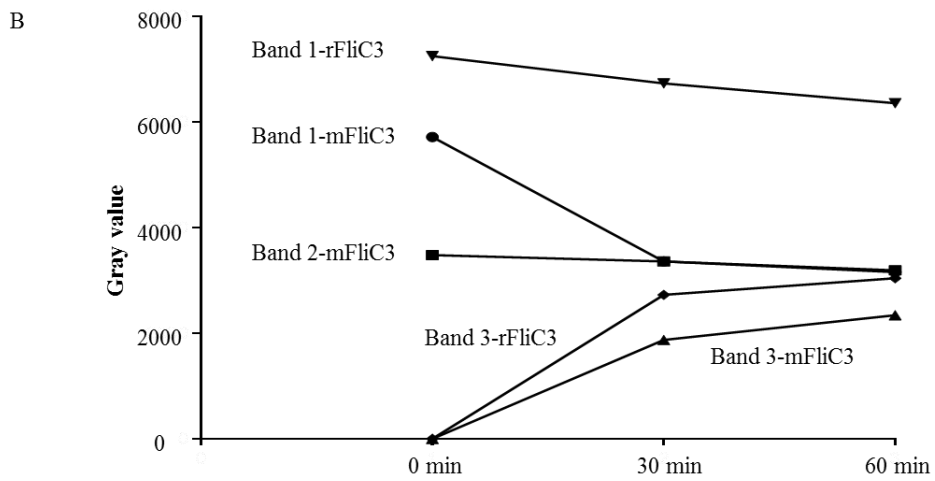

**Supplementary Figure 11. Visualization of mutant variable regions of the deduced SFB *FliC3* and *FliC4* amino acid sequences.**

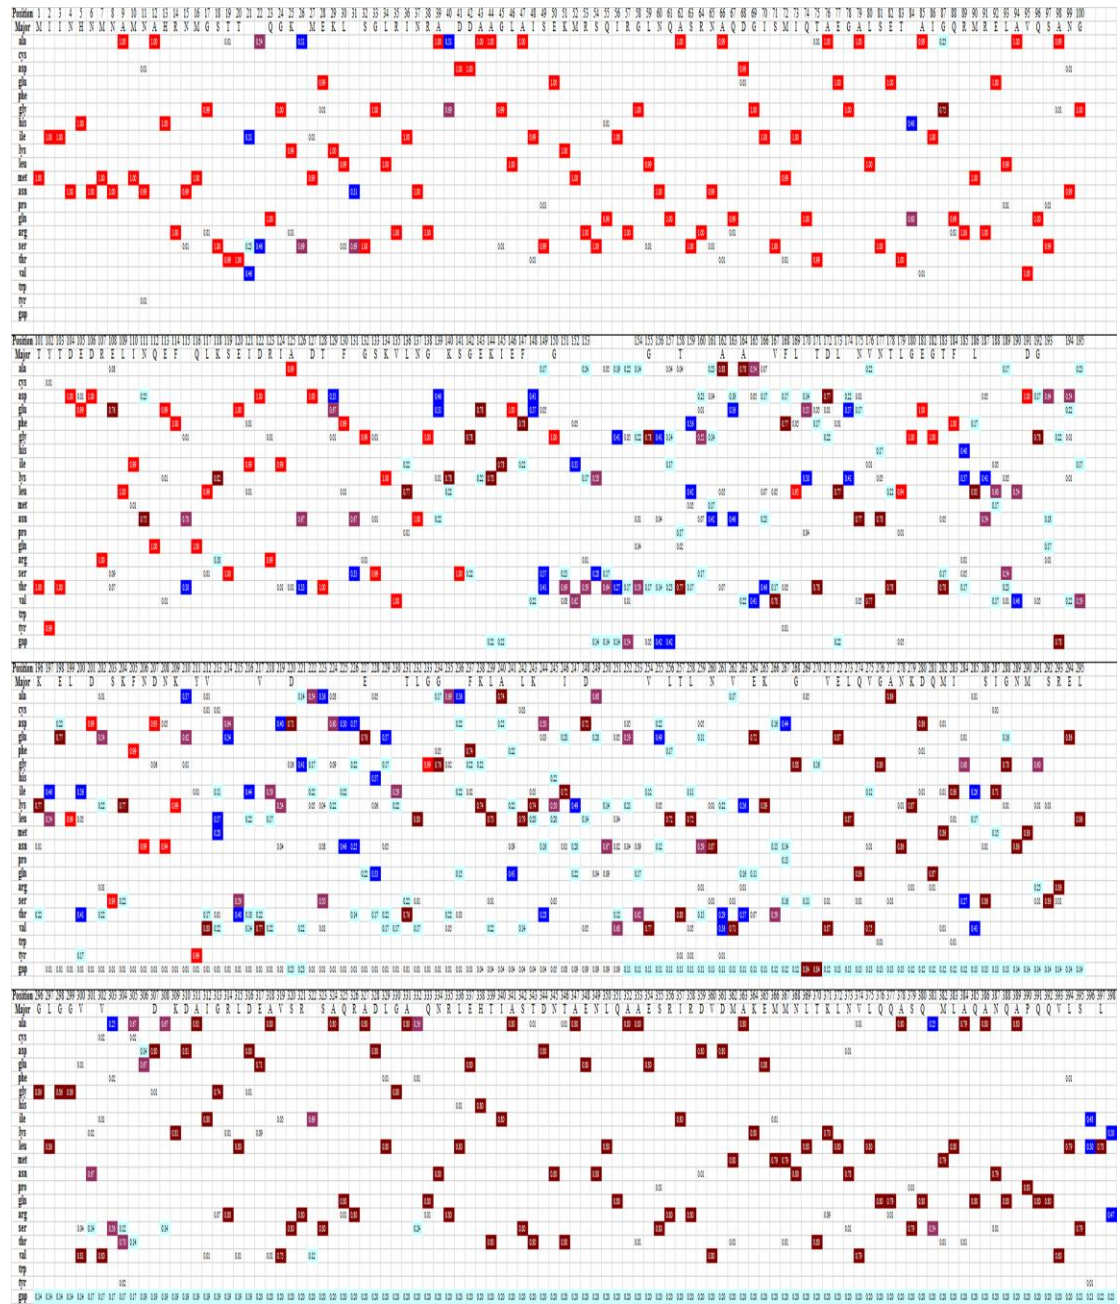

**Supplementary Table 1. Summary PCR detection results of SFB genes.**

| Sample           | 779F-1380R | <i>fliC 1</i> | <i>fliC 2</i> | <i>fliC 3</i> | <i>fliC 4</i> |
|------------------|------------|---------------|---------------|---------------|---------------|
| SFB-Mouse-Japan* | +          | +             | +             | +             | +             |
| SFB-Mouse-NYU*   | +          | -             | +             | -             | +             |
| SFB-Mouse-SU*    | +          | -             | +             | -             | +             |
| SFB-Mouse-Yit*   | +          | -             | +             | -             | +             |
| Mouse 1          | Ileum      | +             | +             | +             | +             |
|                  | Cecum      | +             | +             | +             | +             |
| Mouse 2          | Ileum      | +             | +             | +             | +             |
|                  | Cecum      | +             | +             | +             | +             |
| Mouse 3          | Ileum      | +             | +             | +             | +             |
|                  | Cecum      | +             | +             | +             | +             |
| Mouse 4          | Ileum      | +             | +             | +             | +             |
|                  | Cecum      | +             | +             | +             | +             |
| Mouse 5          | Ileum      | +             | +             | +             | +             |
|                  | Cecum      | +             | +             | +             | +             |
| Mouse 6          | Ileum      | +             | +             | +             | +             |
|                  | Cecum      | +             | +             | +             | +             |
| SFB-Rat-Yit*     | +          | -             | +             | +             | +             |
| Rat 1            | Ileum      | +             | +             | -             | +             |
|                  | Cecum      | +             | +             | -             | +             |
| Rat 2            | Ileum      | +             | +             | -             | +             |
|                  | Cecum      | +             | +             | -             | +             |
| Rat 3            | Ileum      | +             | +             | -             | +             |
|                  | Cecum      | +             | +             | -             | +             |
| Rat 4            | Ileum      | +             | +             | -             | +             |
|                  | Cecum      | +             | +             | -             | +             |
| Rat 5            | Ileum      | +             | +             | -             | +             |
|                  | Cecum      | +             | +             | -             | +             |
| Rat 6            | Ileum      | +             | +             | -             | +             |
|                  | Cecum      | +             | +             | -             | +             |

\*, represents genes identified from full-length genome sequences.

**Supplementary Table 2. The diversity of mouse SFB flagellin genes.**

| Mouse genes                       | Sample name | No. of sequences | Individual difference    |                     |                                                            |
|-----------------------------------|-------------|------------------|--------------------------|---------------------|------------------------------------------------------------|
|                                   |             |                  | Nucleotide acid homology | Amino acid homology | Stop codon                                                 |
| <i>fliC1</i><br>840 bp<br>279 aa  | M3C         | 10               | 99.2%-100% (5)           | 98.9-100% (6)       | NA                                                         |
|                                   | M3I         | 6                | 99.5%-100% (3)           | 99.3%-100% (4)      | NA                                                         |
|                                   | M4C         | 11               | 97.8%-100% (5)           | 97.8-100% (6)       | NA                                                         |
|                                   | M5C         | 10               | 97.4%-100% (4)           | 97.1%-100% (6)      | 58 aa (1)                                                  |
|                                   | M5I         | 12               | 97.3%-100% (3)           | 96.4%-100% (4)      | NA                                                         |
| <i>fliC2</i><br>1191 bp<br>396 aa | M3C         | 10               | 99.7%-100% (4)           | 99.2%-100% (5)      | NA                                                         |
|                                   | M3I         | 10               | 99.6%-100% (2)           | 89.0%-100% (4)      | 363 aa (1)                                                 |
|                                   | M4C         | 10               | 99.7%-100% (2)           | 99.2%-100% (2)      | NA                                                         |
|                                   | M4I         | 11               | 99.2%-99.9%              | 98.7%-100% (3)      | NA                                                         |
|                                   | M5C         | 10               | 99.3%-100% (2)           | 95.3%-100% (2)      | 271 aa (1), 276 aa (1)                                     |
| <i>fliC3</i><br>1203 bp<br>400 aa | M5I         | 10               | 99.4%-100% (2)           | 98.7%-100% (2)      | 298 aa (1), 380 aa (1)                                     |
|                                   | M3C         | 11               | 81.6%-99.7%              | 76.4%-100% (4)      | 109 aa (5), 292 aa (1), 315 aa (1), 397 aa (1), 398 aa (3) |
|                                   | M3I         | 10               | 81.8%-100% (2)           | 81.9%-100% (2)      | 81 aa (1), 109 aa (2), 397 aa (2), 398 aa (5)              |
|                                   | M4C         | 10               | 83.2%-99.8%              | 82.1%-100% (5)      | 397 aa (7), 398 aa (3)                                     |
|                                   | M4I         | 13               | 82.4%-99.7%              | 82.4%-100% (4)      | 1397 aa (10), 398 aa (3)                                   |
| <i>fliC4</i><br>1194 bp<br>397 aa | M5C         | 10               | 90.4%-100% (2)           | 81.6%-100% (3)      | 304 aa (1), 397 aa (8), 398 aa (1)                         |
|                                   | M5I         | 12               | 83.1%-99.7%              | 81.9%-100% (3)      | 397 aa (9), 398 aa (3)                                     |
|                                   | M3C         | 10               | 81.9%-99.9%              | 82.4%-99.5% (4)     | 109 aa (5), 300 aa (1), 365 aa (1), 397 aa (1)             |
|                                   | M3I         | 10               | 81.9%-99.9%              | 66.7%-100% (2)      | 6 aa (1), 9 aa (1), 109 aa (2), 217 aa (1)                 |
|                                   | M4C         | 10               | 82.2%-99.8%              | 82.3%-93.7%         | 104 aa (1), 119 aa (2), 395 aa (1), 397 aa (4)             |
|                                   | M5C         | 10               | 83.2%-100% (2)           | 81.6%-100% (2)      | 197 aa (1), 304 aa (1)                                     |
|                                   | M5I         | 11               | 83.4%-100% (2)           | 76.4%-100% (5)      | 305 aa (1)                                                 |

NA, not analyzed. Numbers in parentheses represent number of duplicate sequences.

**Supplementary Table 3. The diversity of rat SFB genes.**

| Rat genes                         | Sample name | No. of sequences | Nucleotide acid homology | Individual difference |                                                                                  |
|-----------------------------------|-------------|------------------|--------------------------|-----------------------|----------------------------------------------------------------------------------|
|                                   |             |                  |                          | Amino acid homology   | Stop codon                                                                       |
| <i>fliC1</i><br>840 bp<br>279 aa  | R2C         | 11               | 98.5%-100% (2)           | 97.4%-100% (2)        | 29 aa (3)                                                                        |
|                                   | R5C         | 10               | 99.0%-100%               | 98.1%-100% (2)        | 29 aa (3)                                                                        |
|                                   | R6C         | 12               | 99.3%-99.9%              | 98.9%-99.6%           | 29 aa (6)                                                                        |
|                                   | R2I         | 11               | 86.6%-99.9%              | 98.1%-99.6%           | 29 aa (3), 61 aa (1)                                                             |
|                                   | R3I         | 11               | 97.1%-99.9%              | 96.3%-100% (2)        | 29 aa (5)                                                                        |
|                                   | R5I         | 11               | 99.3%-100% (5)           | 98.9%-99.3%           | 29 aa (7)                                                                        |
| <i>fliC3</i><br>1203 bp<br>400 aa | R2C         | 10               | 75.5%-100% (2)           | 70.3%-100% (3)        | 41 aa (1), 59 aa (1), 394 aa (2), 396 aa (2), 399 aa (4)                         |
|                                   | R3C         | 10               | 75.3%-99.8%              | 70.2%-100% (2)        | 49 aa (1), 109,aa (1), 396 aa (6), 399 aa (2)                                    |
|                                   | R4C         | 11               | 99.1%-99.8%              | 89.8%-100% (3)        | 35 aa (1), 49 aa (1), 302 aa (3), 399 aa (2)                                     |
|                                   | R1I         | 10               | 74.9%-99.7%              | 69.2%-99.7            | 106 aa (1), 109 aa (1), 115 aa (1), 269 aa (1), 396 aa (1)                       |
|                                   | R4I         | 11               | 99.7%-100% (2)           | 99.8%-100% (9)        | 282 aa (1)                                                                       |
| <i>fliC4</i><br>1191 bp<br>396 aa | R1C         | 11               | 75.9%-99.8%              | 56.3%-99.8%           | 49 aa (1), 76 aa (1), 237 aa (1), 247 aa (1), 253 aa (1), 273 aa (1), 277 aa (1) |
|                                   | R4C         | 10               | 77.2%-100% (2)           | 61.7%-100% (2)        | 59 aa (1), 121 aa (1), 237 aa (1), 244 aa (1), 247 aa (1), 253 aa (1), 276 aa    |
|                                   | R4I         | 11               | 77.1%-100% (2)           | 50.0%-100% (3)        | 6 aa (1), 237 aa (1), 244 aa (1), 246 aa (1), 247 aa (1), 253 aa (1)             |
|                                   | R6I         | 10               | 75.5%-100% (3)           | 61.5%-100% (5)        | 247 aa (1)                                                                       |
| 16S RNA<br>619 bp                 | R2C         | 11               | 99.7%-100% (7)           | NA                    | NA                                                                               |
|                                   | R4C         | 11               | 99.4%-100% (8)           | NA                    | NA                                                                               |
|                                   | R5C         | 10               | 99.7%-100% (6)           | NA                    | NA                                                                               |
|                                   | R2I         | 11               | 99.5%-100% (7)           | NA                    | NA                                                                               |
|                                   | R4I         | 11               | 99.4%-100% (6)           | NA                    | NA                                                                               |
|                                   | R5I         | 11               | 99.4%-100% (4)           | NA                    | NA                                                                               |

NA, not analyzed. Numbers in parentheses represent number of duplicate sequences.

**Supplementary Table 4. Statistical analysis of NF- $\kappa$ B signaling data using multi-way analysis of variance (ANOVA) tests\*.**

**A**

|                                                 | PCDNA3 | PCDNA3-mTLR5 | PCDNA3-rTLR5 |
|-------------------------------------------------|--------|--------------|--------------|
| Buffer : Sal-FliC 1 $\mu$ g                     | 1.000  | 0.863        | 1.000        |
| Buffer : Sal-FliC 10 $\mu$ g                    | 1.000  | 1.000        | 0.910        |
| Buffer : M5I-FliC3-2 1 $\mu$ g                  | 1.000  | 0.943        | 1.000        |
| Buffer : M5I-FliC3-2 10 $\mu$ g                 | 1.000  | 1.000        | 0.786        |
| Buffer : M5I-FliC3-1 1 $\mu$ g                  | 1.000  | 0.896        | 1.000        |
| Buffer : M5I-FliC3-1 10 $\mu$ g                 | 1.000  | 1.000        | 0.788        |
| Buffer : R4I-FliC3-1 1 $\mu$ g                  | 0.462  | 1.000        | 0.994        |
| Buffer : R4I-FliC3-1 10 $\mu$ g                 | 0.999  | 1.000        | 0.904        |
| Buffer : R1I-FliC3-10 1 $\mu$ g                 | 1.000  | 0.993        | 1.000        |
| Buffer : R1I-FliC3-10 10 $\mu$ g                | 1.000  | 1.000        | 0.958        |
| Sal-FliC 1 $\mu$ g : Sal-FliC 10 $\mu$ g        | 1.000  | 1.000        | 1.000        |
| Sal-FliC 1 $\mu$ g : M5I-FliC3-2 1 $\mu$ g      | 1.000  | 1.000        | 1.000        |
| Sal-FliC 1 $\mu$ g : M5I-FliC3-2 10 $\mu$ g     | 1.000  | 1.000        | 1.000        |
| Sal-FliC 1 $\mu$ g : M5I-FliC3-1 1 $\mu$ g      | 1.000  | 1.000        | 1.000        |
| Sal-FliC 1 $\mu$ g : M5I-FliC3-1 10 $\mu$ g     | 1.000  | 1.000        | 1.000        |
| Sal-FliC 1 $\mu$ g : R4I-FliC3-1 1 $\mu$ g      | 1.000  | 1.000        | 1.000        |
| Sal-FliC 1 $\mu$ g : R4I-FliC3-1 10 $\mu$ g     | 1.000  | 1.000        | 1.000        |
| Sal-FliC 1 $\mu$ g : R1I-FliC3-10 1 $\mu$ g     | 1.000  | 1.000        | 1.000        |
| Sal-FliC 1 $\mu$ g : R1I-FliC3-10 10 $\mu$ g    | 1.000  | 1.000        | 1.000        |
| Sal-FliC 10 $\mu$ g : M5I-FliC3-2 1 $\mu$ g     | 1.000  | 1.000        | 1.000        |
| Sal-FliC 10 $\mu$ g : M5I-FliC3-2 10 $\mu$ g    | 1.000  | 1.000        | 1.000        |
| Sal-FliC 10 $\mu$ g : M5I-FliC3-1 1 $\mu$ g     | 1.000  | 1.000        | 1.000        |
| Sal-FliC 10 $\mu$ g : M5I-FliC3-1 10 $\mu$ g    | 1.000  | 1.000        | 1.000        |
| Sal-FliC 10 $\mu$ g : R4I-FliC3-1 1 $\mu$ g     | 1.000  | 1.000        | 1.000        |
| Sal-FliC 10 $\mu$ g : R4I-FliC3-1 10 $\mu$ g    | 1.000  | 1.000        | 1.000        |
| Sal-FliC 10 $\mu$ g : R1I-FliC3-10 1 $\mu$ g    | 1.000  | 1.000        | 1.000        |
| Sal-FliC 10 $\mu$ g : R1I-FliC3-10 10 $\mu$ g   | 1.000  | 1.000        | 1.000        |
| M5I-FliC3-2 1 $\mu$ g : M5I-FliC3-2 10 $\mu$ g  | 1.000  | 1.000        | 1.000        |
| M5I-FliC3-2 1 $\mu$ g : M5I-FliC3-1 1 $\mu$ g   | 1.000  | 1.000        | 1.000        |
| M5I-FliC3-2 1 $\mu$ g : M5I-FliC3-1 10 $\mu$ g  | 0.995  | 1.000        | 1.000        |
| M5I-FliC3-2 1 $\mu$ g : R4I-FliC3-1 1 $\mu$ g   | 1.000  | 1.000        | 1.000        |
| M5I-FliC3-2 1 $\mu$ g : R4I-FliC3-1 10 $\mu$ g  | 1.000  | 1.000        | 1.000        |
| M5I-FliC3-2 1 $\mu$ g : R1I-FliC3-10 1 $\mu$ g  | 1.000  | 1.000        | 1.000        |
| M5I-FliC3-2 1 $\mu$ g : R1I-FliC3-10 10 $\mu$ g | 1.000  | 1.000        | 1.000        |
| M5I-FliC3-2 10 $\mu$ g : M5I-FliC3-1 1 $\mu$ g  | 1.000  | 1.000        | 1.000        |
| M5I-FliC3-2 10 $\mu$ g : M5I-FliC3-1 10 $\mu$ g | 1.000  | 1.000        | 1.000        |
| M5I-FliC3-2 10 $\mu$ g : R4I-FliC3-1 1 $\mu$ g  | 1.000  | 1.000        | 0.999        |

|                                        |       |       |       |
|----------------------------------------|-------|-------|-------|
| M5I-FliC3-2 10 µg : R4I-FliC3-1 10 µg  | 1.000 | 1.000 | 1.000 |
| M5I-FliC3-2 10 µg : R1I-FliC3-10 1 µg  | 1.000 | 1.000 | 1.000 |
| M5I-FliC3-2 10 µg : R1I-FliC3-10 10 µg | 1.000 | 1.000 | 1.000 |
| M5I-FliC3-1 1 µg : M5I-FliC3-1 10 µg   | 0.999 | 1.000 | 1.000 |
| M5I-FliC3-1 1 µg : R4I-FliC3-1 1 µg    | 1.000 | 1.000 | 1.000 |
| M5I-FliC3-1 1 µg : R4I-FliC3-1 10 µg   | 1.000 | 1.000 | 1.000 |
| M5I-FliC3-1 1 µg : R1I-FliC3-10 1 µg   | 1.000 | 1.000 | 1.000 |
| M5I-FliC3-1 1 µg : R1I-FliC3-10 10 µg  | 1.000 | 1.000 | 1.000 |
| M5I-FliC3-1 10 µg : R4I-FliC3-1 1 µg   | 1.000 | 1.000 | 0.999 |
| M5I-FliC3-1 10 µg : R4I-FliC3-1 10 µg  | 1.000 | 1.000 | 1.000 |
| M5I-FliC3-1 10 µg : R1I-FliC3-10 1 µg  | 1.000 | 1.000 | 1.000 |
| M5I-FliC3-1 10 µg : R1I-FliC3-10 10 µg | 1.000 | 1.000 | 1.000 |
| R4I-FliC3-1 1 µg : R4I-FliC3-1 10 µg   | 1.000 | 1.000 | 1.000 |
| R4I-FliC3-1 1 µg : R1I-FliC3-10 1 µg   | 1.000 | 1.000 | 1.000 |
| R4I-FliC3-1 1 µg : R1I-FliC3-10 10 µg  | 1.000 | 1.000 | 0.999 |
| R4I-FliC3-1 10 µg : R1I-FliC3-10 1 µg  | 1.000 | 1.000 | 1.000 |
| R4I-FliC3-1 10 µg : R1I-FliC3-10 10 µg | 1.000 | 1.000 | 1.000 |
| R1I-FliC3-10 1 µg : R1I-FliC3-10 10 µg | 1.000 | 1.000 | 1.000 |

## B

|                          |                             |       |
|--------------------------|-----------------------------|-------|
| <b>Buffer</b>            | pCDNA3 : pCDNA3-mTLR5       | 0.740 |
|                          | pCDNA3 : pCDNA3-rTLR5       | 0.928 |
|                          | pCDNA3-mTLR5 : pCDNA3-rTLR5 | 0.873 |
| <b>Sal-FliC 1 µg</b>     | pCDNA3 : pCDNA3-mTLR5       | 0.199 |
|                          | pCDNA3 : pCDNA3-rTLR5       | 0.624 |
|                          | pCDNA3-mTLR5 : pCDNA3-rTLR5 | 0.259 |
| <b>Sal-FliC 10 µg</b>    | pCDNA3 : pCDNA3-mTLR5       | 0.590 |
|                          | pCDNA3 : pCDNA3-rTLR5       | 0.172 |
|                          | pCDNA3-mTLR5 : pCDNA3-rTLR5 | 0.786 |
| <b>M5I-FliC3-2 1 µg</b>  | pCDNA3 : pCDNA3-mTLR5       | 0.248 |
|                          | pCDNA3 : pCDNA3-rTLR5       | 0.623 |
|                          | pCDNA3-mTLR5 : pCDNA3-rTLR5 | 0.264 |
| <b>M5I-FliC3-2 10 µg</b> | pCDNA3 : pCDNA3-mTLR5       | 0.499 |
|                          | pCDNA3 : pCDNA3-rTLR5       | 0.195 |
|                          | pCDNA3-mTLR5 : pCDNA3-rTLR5 | 0.728 |
| <b>M5I-FliC3-1 1 µg</b>  | pCDNA3 : pCDNA3-mTLR5       | 0.063 |
|                          | pCDNA3 : pCDNA3-rTLR5       | 0.487 |
|                          | pCDNA3-mTLR5 : pCDNA3-rTLR5 | 0.211 |
| <b>M5I-FliC3-1 10 µg</b> | pCDNA3 : pCDNA3-mTLR5       | 0.503 |
|                          | pCDNA3 : pCDNA3-rTLR5       | 0.196 |
|                          | pCDNA3-mTLR5 : pCDNA3-rTLR5 | 0.720 |



|                           |                             |       |
|---------------------------|-----------------------------|-------|
| <b>R4I-FliC3-1 1 µg</b>   | pCDNA3 : pCDNA3-mTLR5       | 0.816 |
|                           | pCDNA3 : pCDNA3-rTLR5       | 0.336 |
|                           | pCDNA3-mTLR5 : pCDNA3-rTLR5 | 0.979 |
| <b>R4I-FliC3-1 10 µg</b>  | pCDNA3 : pCDNA3-mTLR5       | 0.496 |
|                           | pCDNA3 : pCDNA3-rTLR5       | 0.253 |
|                           | pCDNA3-mTLR5 : pCDNA3-rTLR5 | 0.695 |
| <b>R1I-FliC3-10 1 µg</b>  | pCDNA3 : pCDNA3-mTLR5       | 0.319 |
|                           | pCDNA3 : pCDNA3-rTLR5       | 0.532 |
|                           | pCDNA3-mTLR5 : pCDNA3-rTLR5 | 0.400 |
| <b>R1I-FliC3-10 10 µg</b> | pCDNA3 : pCDNA3-mTLR5       | 0.484 |
|                           | pCDNA3 : pCDNA3-rTLR5       | 0.031 |
|                           | pCDNA3-mTLR5 : pCDNA3-rTLR5 | 0.755 |

\*, numbers in this table represent the p value.

**Supplementary Table 5. Gene Ontology analysis of the pull-down-enriched proteins.**

| Category                 | mFliC3                             | rFliC3                                       |
|--------------------------|------------------------------------|----------------------------------------------|
| MF                       | actin binding                      | actin binding                                |
|                          | cytoskeletal protein binding       | cytoskeletal protein binding                 |
|                          | nucleotide binding                 | nucleotide binding                           |
|                          | RNA binding                        | RNA binding                                  |
|                          | structural molecule activity       | structural molecule activity                 |
|                          | cofactor binding                   |                                              |
|                          | unfolded protein binding           |                                              |
|                          |                                    | exopeptidase activity                        |
| CC                       | actin cytoskeleton                 | actin cytoskeleton                           |
|                          | cell-cell adherens junction        | cell-cell adherens junction                  |
|                          | contractile fiber                  | contractile fiber                            |
|                          | contractile fiber part             | contractile fiber part                       |
|                          | cortical cytoskeleton              | cortical cytoskeleton                        |
|                          | cytoskeletal part                  | cytoskeletal part                            |
|                          | cytoskeleton                       | cytoskeleton                                 |
|                          | intermediate filament              | intermediate filament                        |
|                          | intermediate filament cytoskeleton | intermediate filament cytoskeleton           |
|                          |                                    | intracellular non-membrane-bounded organelle |
|                          | intracellular organelle lumen      | intracellular organelle lumen                |
|                          | melanosome                         | melanosome                                   |
|                          | membrane-enclosed lumen            | membrane-enclosed lumen                      |
|                          | mitochondrial envelope             | mitochondrial envelope                       |
|                          | mitochondrial inner membrane       | mitochondrial inner membrane                 |
|                          | mitochondrial membrane             | mitochondrial membrane                       |
|                          | mitochondrial part                 | mitochondrial part                           |
|                          | mitochondrion                      | mitochondrion                                |
|                          | myofibril                          | myofibril                                    |
|                          | non-membrane-bounded organelle     | non-membrane-bounded organelle               |
| organelle inner membrane | organelle inner membrane           |                                              |
| organelle lumen          | organelle lumen                    |                                              |
| organelle membrane       | organelle membrane                 |                                              |
| pigment granule          | pigment granule                    |                                              |
| respiratory chain        | respiratory chain                  |                                              |

ribonucleoprotein complex  
 spliceosome  
 adherens junction  
 anchoring junction  
 basolateral plasma membrane  
 endoplasmic reticulum lumen  
 envelope  
 F-actin capping protein complex  
 I band  
 organelle envelope  
 Z disc

ribonucleoprotein complex  
 spliceosome

actin filament bundle  
 actomyosin  
 cell cortex  
 cytosol  
 keratin filament  
 lysosome  
 lytic vacuole  
 mitochondrial lumen  
 mitochondrial matrix  
 soluble fraction  
 stress fiber  
 vacuole

BP

actin cytoskeleton organization  
 actin filament capping  
 actin filament-based process  
 cytoskeleton organization  
 generation of precursor metabolites  
 and energy  
 mRNA metabolic process  
 mRNA processing  
 negative regulation of actin filament  
 depolymerization  
 negative regulation of actin filament  
 polymerization  
 negative regulation of protein complex  
 assembly  
 negative regulation of protein  
 polymerization  
 regulation of actin filament  
 depolymerization  
 RNA processing  
 RNA splicing

actin cytoskeleton organization  
 actin filament capping  
 actin filament-based process  
 cytoskeleton organization  
 generation of precursor  
 metabolites and energy  
 mRNA metabolic process  
 mRNA processing  
 negative regulation of actin  
 filament depolymerization  
 negative regulation of actin  
 filament polymerization  
 negative regulation of protein  
 complex assembly  
 negative regulation of protein  
 polymerization  
 regulation of actin filament  
 depolymerization  
 RNA processing  
 RNA splicing

electron transport chain  
 negative regulation of cellular  
 component organization  
 negative regulation of cytoskeleton  
 organization  
 negative regulation of organelle  
 organization  
 negative regulation of protein complex  
 disassembly  
 oxidation reduction  
 protein folding  
 regulation of actin cytoskeleton  
 organization  
 regulation of actin filament length  
 regulation of actin filament  
 polymerization  
 regulation of actin filament-based  
 process  
 regulation of actin polymerization or  
 depolymerization  
 regulation of cytoskeleton  
 organization  
 regulation of organelle organization  
 regulation of protein complex  
 disassembly

cellular macromolecular complex  
 subunit organization  
 homeostasis of number of cells  
 macromolecular complex  
 assembly  
 macromolecular complex subunit  
 organization  
 protein complex assembly  
 protein complex biogenesis  
 proteolysis

---

MF, molecular function; CC, cell component; BP, biology process.

**Supplementary Table 6. Number of genes related to actin binding isolated during pull-down that.**

| GO Terms                                               | mFliC3* | rFliC3* |
|--------------------------------------------------------|---------|---------|
| actin binding                                          | 25      | 25      |
| actin cytoskeleton                                     | 16      | 19      |
| actin cytoskeleton organization                        | 14      | 18      |
| actin cytoskeleton reorganization                      | 0       | 3       |
| actin filament binding                                 | 0       | 7       |
| actin filament bundle                                  | 0       | 6       |
| actin filament bundle formation                        | 0       | 3       |
| actin filament capping                                 | 6       | 6       |
| actin filament organization                            | 0       | 6       |
| actin filament severing                                | 0       | 2       |
| actin filament-based process                           | 14      | 0       |
| F-actin capping protein complex                        | 3       | 0       |
| negative regulation of actin filament depolymerization | 7       | 6       |
| negative regulation of actin filament polymerization   | 6       | 6       |
| regulation of actin cytoskeleton organization          | 8       | 6       |
| regulation of actin filament depolymerization          | 7       | 6       |
| regulation of actin filament length                    | 8       | 6       |
| regulation of actin filament polymerization            | 7       | 6       |
| regulation of actin filament-based process             | 8       | 6       |
| regulation of actin polymerization or depolymerization | 8       | 6       |

\*, number of genes interacted with mFliC3 or rFliC3.

## Figure legends

### **Supplementary Figure 1. Host specificity analysis of SFB 16S rRNA gene sequences.**

65 rat SFB 16S rRNA gene sequences were obtained via clone library sequencing. In each sample, duplicate sequences were deleted retaining a single sequence for further analysis. Other human, mouse, chicken and ratSFB 16S rRNA gene sequences were downloaded from NCBI as previously described (1). In total, 74 chicken sequences, 139 human sequences, 112 mouse sequences and 35 rat sequences were used for phylogenetic analysis using MEGA 6 with the neighbor joining algorithm. Green squares represent mouse SFB 16S rRNA gene sequences; red squares represent rat SFB 16S rRNA gene sequences; blue squares represent chicken SFB 16S rRNA gene sequences; purple squares represent human SFB 16S rRNA gene sequences.

### **Supplementary Figure 2. Host specificity analysis of SFB *fliC1* at nucleotide and deduced amino acid levels.**

66 rat SFB *fliC1*, 49 mouse SFB *fliC1* gene sequences were obtained from clone library sequencing. In each sample, duplicate sequences were deleted preserving one sequence for further analysis. Deduced amino acid sequences that were shorter than half of the published SFB FliC genes were removed. In all, 95 *fliC1* nucleotide sequences and 56 deduced FliC1 amino acid sequences were used for phylogenetic analysis. Three mouse SFB *fliC1* sequences and one rat SFB *fliC1* sequence were

downloaded from the NCBI database. Finally, 99 *fliC1* nucleotide sequences (A) and 60 deduced amino acid sequences (B) were aligned and then used to construct a phylogenetic tree using MEGA 6 with the neighbor joining algorithm. Red upward-facing triangles represent rat SFB *fliC1* sequences; the green upward-facing triangles represent mouse SFB *fliC1* sequences.

**Supplementary Figure 3. Staining of *E. coli* BL21 and *Salmonella* CVCC519 with DAPI and SFB FliC3 antibody.**

The bacterium *E. coli* BL21 and *Salmonella* CVCC519 were fixed in 4% paraformaldehyde solution and sequentially hybridized with a rabbit anti-FliC3 primary antibody and DAPI. An Olympus IX83 was used to observe the results. A and D represent the DAPI stain results of *E. coli* BL21 and *Salmonella* CVCC519, respectively. B and E represent the SFB FliC3 antibody stain results of *E. coli* BL21 and *Salmonella* CVCC519, respectively. C and F are merged images.

**Supplementary Figure 4. Expression of SFB FliC3 in mouse ileum mucosa and cecal content using FISH and IHC analysis.**

Ileal mucosa and cecal contents were fixed in 4% paraformaldehyde solution, and sequential hybridization with a SFB-specific oligonucleotide probe, rabbit anti-FliC3 primary antibody and FITC goat anti-rabbit IgG (H+L) antibody, DAPI was then used to stain the nuclei. A Leica fluorescent microscope DM2500 was used to observe the results. A and E, represent the DAPI stain result. B and F, represent the

results of hybridization with SFB-specific oligonucleotide probe. C and G, represent the results of hybridization with rabbit anti-FliC3 primary antibody and FITC goat anti-rabbit IgG (H+L) antibody. D and H, represent the overlapped signal between B and C. Arrow represents the presence of SFB.

#### **Supplementary Figure 5. Relative location of SFB in gut epithelial tissue.**

Ileal (A-D) and colon (E-H) tissue samples were fixed in 4% paraformaldehyde and prepared as frozen sections. After sequential hybridization with primary antibody (mouse anti-muc2 and rabbit anti-mFliC3 antibody) and the secondary antibody (donkey anti-mouse IgG (H+L) and FITC goat anti-rabbit IgG (H+L) antibody), DAPI was then used to stain nuclei. A two photon confocal microscope (ZEISS LSM 800) were used to observe the cells. A and E show the DAPI stain results. B and F show the hybridization results with rabbit anti-mFliC3 primary antibody. C and G show the results of hybridization with mouse anti-muc2 primary antibody. D represents the overlapped signal between B and C. H represents the overlapped signal between F and G.

#### **Supplementary Figure 6. Identification of genes related to flagellar assembly using LC/MC/MC in mouse gut samples.**

Ileum mucosal and cecal contents protein on the SDS-PAGE gel in the 37-50 kD region were cut from the gel and sent for LC/MC/MC identity. Proteins relating to flagellar assembly among identified SFB proteins are marked with a red box.



**Supplementary Figure 7. Peptides identified from purified mFliC3 bands.**

Bands 1 and 2 (as illustrated in Figure 5) were cut from purified mFliC3 protein. Peptides identified from these two bands were then mapped FliC3 amino acid sequences of SFB-mouse-Japan (BioProject: PRJDA66727).

**Supplementary Figure 8. Phylogenetic analysis of the TLR5 genes at the nucleotide and deduced amino acid levels.**

50 chicken TLR5, 6 mouse TLR5 and 7 rat TLR5 nucleotide sequences were downloaded from the NCBI database. Nucleotide sequences (A) and deduced amino acid sequences (B) were aligned and then used to construct a phylogenetic tree using MEGA 6 with the neighbor joining algorithm. Green squares represent mouse TLR5 sequences; the red squares represent rat TLR5 sequences; the blue squares represent chicken TLR5 sequences.

**Supplementary Figure 9. rFliC3 enriched proteins that related to the lysosome pathway.**

Mouse mucosal proteins which were collected by pull-down with SFB FliC3 were identified using LC/MS/MS and sent then for KEGG pathway analysis. rFliC3 enriched proteins that related to the lysosome pathway were marked with red boxes.

**Supplementary Figure 10. Degradation of mFliC3 and rFliC3 by rat ileum tissue proteins.**

Purified mFliC3 and rFliC3 were separately allowed to interact *in vitro* with rat mucosal proteins. (A) samples of these interaction mixtures were collected at different times and assessed using SDS-PAGE and immunoblotting with an anti-His antibody. (B) The concentrations of the protein bands were quantified by Image J (B).

**Supplementary Figure 11. Visualization of mutant variable regions of the deduced SFB FliC3 and FliC4 amino acid sequences.**

52 rat SFB *fliC3*, 42 rat SFB *fliC4*, 66 mouse SFB *fliC3* and 51 mouse SFB *fliC4* gene sequences were obtained from clone library sequencing. In each sample, duplicate sequences were deleted except one with one sequence preserved for further analysis. Deduced amino acid sequences which were shorter than half of the published SFB FliC genes were removed. In all, 130 SFB FliC3 and FliC4 sequences obtained in this study and 8 SFB FliC3 and FliC4 sequences downloaded from the NCBI database were used for alignment. JProfileGrid software was used for multiple sequence alignment visualization. Different colors represent sequence homology at the site for each amino acid. The number represents the percentage chance for each amino acid.

**Reference:**

1. Yin Y, Wang Y, Zhu L, Liu W, Liao N, Jiang M, Zhu B, Yu HD, Xiang C, Wang X. 2013. Comparative analysis of the distribution of segmented filamentous bacteria in humans, mice and chickens. *ISME J* 7:615-21.
